# Supplementary material for: Galectin-1-Binding Glycoforms of Haptoglobin with Altered Intracellular Trafficking, and Increase in Metastatic Breast Cancer Patients
Source: PubMed Central journal article supplement (PMC3196588; doi:10.1371/journal.pone.0026560), 2011-10-18

A

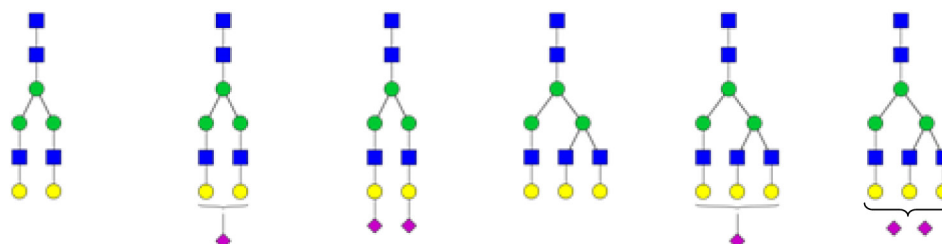

**Site 1** M(ox)<sub>54</sub>VSHH**N**LTTGATLINEQWLLTTAK<sub>77</sub>

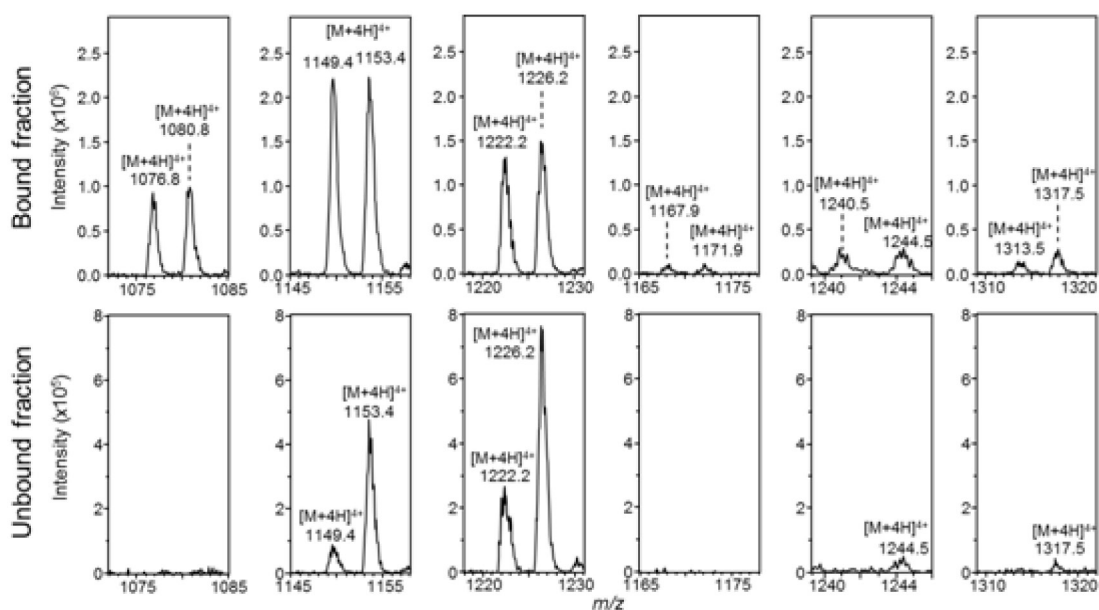

**Site 4** V<sub>111</sub>VLHP**N**YSQVDIGLIK<sub>126</sub>

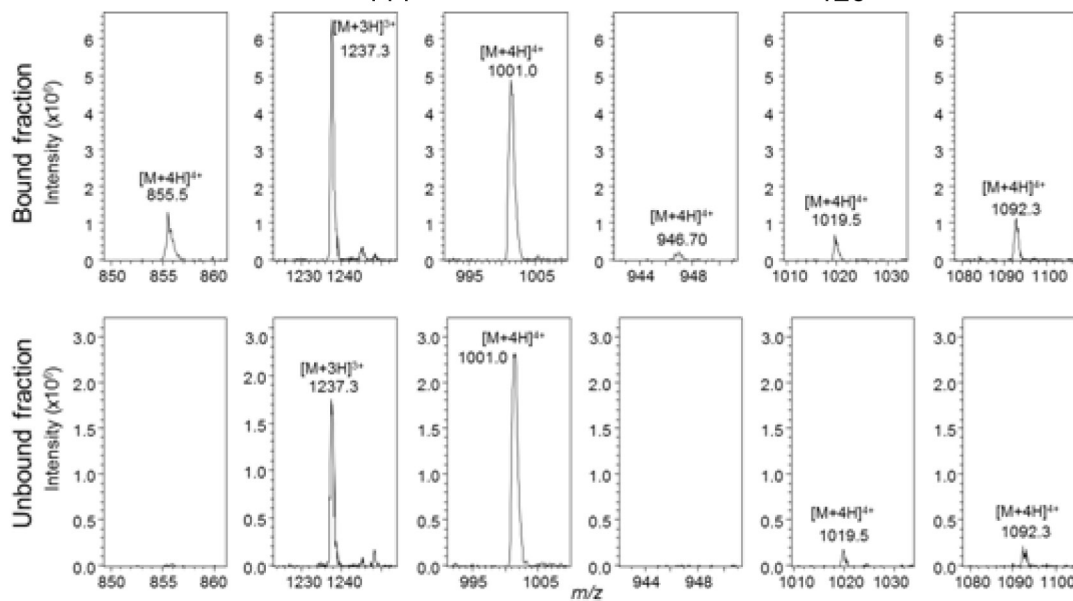

B

Site 2 and 3  $N_{78}LFLNHSENA_{90}TAK_{90}$

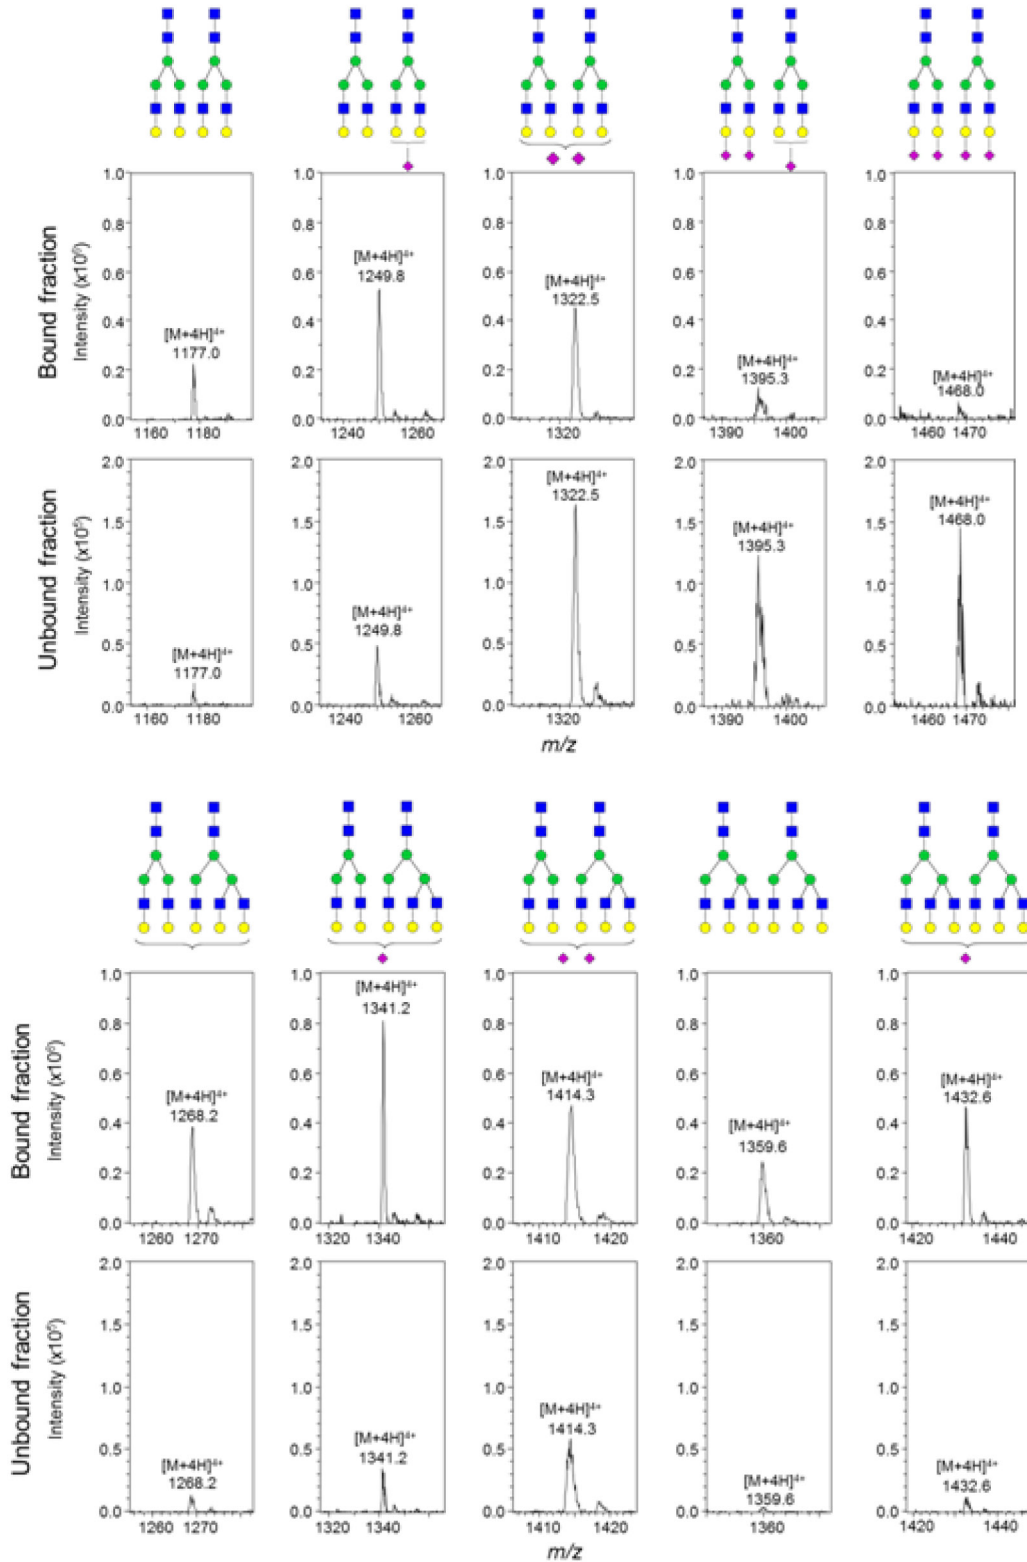

Supplement: pone.0026560.s003.pdf [file pone.0026560.s003.pdf]
